# Supplementary material
Source: Springer Nature journal article supplement (https://www.springermedizin.de/resource/supplementary/12991_2008_606_MOESM1_ESM.pdf/9614750)

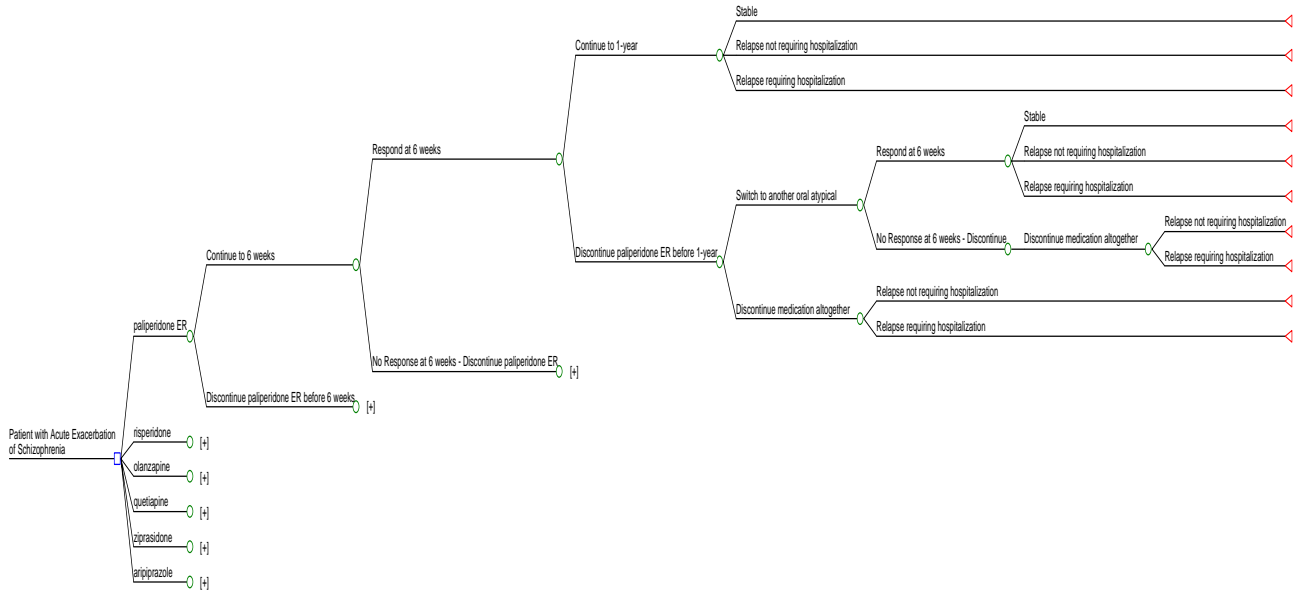

Supplement: MOESM1 [file 9614750]
